# Supplementary material for: The Relationship Between Professional Burnout and Quality and Safety in Healthcare: A Meta-Analysis
Source: Springer Nature journal article supplement (doi:10.1007/s11606-016-3886-9), 2016-10-26
Supplement: MOESM1 [file 10991026]

**The Relationship between Professional Burnout and Quality and Safety in Health Care: A Meta-Analysis**

Supplemental Online Material

Table 1. Description of each coded study.

| Articlea,b,c | Unit | *N* | Population | Setting | Location | Predictor | Quality Indicator | Source | *r* |
| --- | --- | --- | --- | --- | --- | --- | --- | --- | --- |
| Aiken, Sermeus, et al. (2012)  “RN4CAST Study”([1-16](#_ENREF_1))d | I | 3,186 | Nurses | I/O | Belgium | EE | Perceived quality of care | Provider | -.33 |
|  |  |  |  |  | EE | Perceived safety | Provider | -.29 |
|  | 2,918 |  |  | England | EE | Perceived quality of care | Provider | -.35 |
|  |  |  |  |  | EE | Perceived safety | Provider | -.38 |
|  | 1,131 |  |  | Finland | EE | Perceived quality of care | Provider | -.26 |
|  |  |  |  |  | EE | Perceived safety | Provider | -.29 |
|  | 1,508 |  |  | Germany | EE | Perceived quality of care | Provider | -.30 |
|  |  |  |  |  |  | EE | Perceived safety | Provider | -.37 |
|  |  | 367 |  |  | Greece | EE | Perceived quality of care | Provider | -.09 |
|  |  |  |  |  |  | EE | Perceived safety | Provider | -.09 |
|  |  | 1,406 |  |  | Ireland | EE | Perceived quality of care | Provider | -.28 |
|  |  |  |  |  |  | EE | Perceived safety | Provider | -.32 |
|  |  | 2,217 |  |  | Netherlands | EE | Perceived quality of care | Provider | -.31 |
|  |  |  |  |  |  | EE | Perceived safety | Provider | -.31 |
|  |  | 3,752 |  |  | Norway | EE | Perceived quality of care | Provider | -.30 |
|  |  |  |  |  |  | EE | Perceived safety | Provider | -.37 |
|  |  | 2,605 |  |  | Poland | EE | Perceived quality of care | Provider | -.30 |
|  |  |  |  |  |  | EE | Perceived safety | Provider | -.30 |
|  |  | 2,804 |  |  | Spain | EE | Perceived quality of care | Provider | -.29 |
|  |  |  |  |  |  | EE | Perceived safety | Provider | -.31 |
|  |  | 10,133 |  |  | Sweden | EE | Perceived quality of care | Provider | -.35 |
|  |  |  |  |  |  | EE | Perceived safety | Provider | -.39 |
|  |  | 1,632 |  |  | Switzerland | EE | Perceived quality of care | Provider | -.28 |
|  |  |  |  |  |  | EE | Perceived safety | Provider | -.30 |
|  |  | 27,509 |  |  | USA | EE | Perceived quality of care | Provider | -.44 |
|  |  |  |  |  |  | EE | Perceived safety | Provider | -.46 |
|  | H | 428 |  |  | USA | EE: High | % of Patients Rating of hospital (score of 9 or 10 out of 10) | Patient | -.32 |
| Aiken, Sloane, et al. (2011)  “International  Hospital Study”([12](#_ENREF_12), [13](#_ENREF_13), [17-32](#_ENREF_17))d | I | 17,403 | Nurses | I/O | Canada | DEP | Perceived quality of care | Provider | -.01 |
|  |  |  |  |  | EE | Perceived quality of care | Provider | -.29 |
|  |  |  |  |  | RPA | Perceived quality of care | Provider | .00 |
|  | 2,681 |  |  | Germany | DEP | Perceived quality of care | Provider | -.25 |
|  |  |  |  |  | EE | Perceived quality of care | Provider | -.31 |
|  |  |  |  |  | RPA | Perceived quality of care | Provider | -.24 |
|  | 5,956 |  |  | Japan | DEP | Perceived quality of care | Provider | -.17 |
|  |  |  |  |  | EE | Perceived quality of care | Provider | -.16 |
|  |  |  |  |  | RPA | Perceived quality of care | Provider | -.22 |
|  | 4,799 |  |  | New Zealand | DEP | Perceived quality of care | Provider | -.23 |
|  |  |  |  |  | EE | Perceived quality of care | Provider | -.24 |
|  |  |  |  |  | RPA | Perceived quality of care | Provider | -.13 |
|  | 9,855 |  |  | UK | DEP | Perceived quality of care | Provider | -.21 |
|  |  |  |  |  | EE | Perceived quality of care | Provider | -.25 |
|  |  |  |  |  | RPA | Perceived quality of care | Provider | -.13 |
|  | 13,152 |  |  | USA | DEP | Perceived quality of care | Provider | -.28 |
|  |  |  |  |  | EE | Perceived quality of care | Provider | -.32 |
|  |  |  |  |  | RPA | Perceived quality of care | Provider | -.21 |
| Anagnostopoulos et al. (2012)([33](#_ENREF_33)) | I | 30 | Physicians | O | Greece | DEP | Patient satisfaction | Patient | -.54 |
|  |  |  |  |  | EE | Patient satisfaction | Patient | -.64 |
|  |  |  |  |  | RPA | Patient satisfaction | Patient | -.26 |
| Argentero et al. (2008)([34](#_ENREF_34)) | SU | 10 | Clinical care providers | O | Italy | DEP | Patient satisfaction | Patient | -.38 |
|  |  |  |  | EE | Patient satisfaction | Patient | -.90 |
|  |  |  |  |  | RPA | Patient satisfaction | Patient | -.77 |
| Beckman et al. (2012)([35](#_ENREF_35)) | I | 185 | Residents | I/O | USA | EE | Performance assessment | Medical records | -.02 |
|  |  |  |  |  | DPA | Performance assessment | Medical records | .01 |
|  |  |  |  |  |  | RPA | Performance assessment | Medical records | -.05 |
|  |  | 155 |  |  |  | EE | Peer performance ratings | Observer ratings | -.02 |
|  |  |  |  |  |  | DPA | Peer performance ratings | Observer ratings | .02 |
|  |  |  |  |  |  | RPA | Peer performance ratings | Observer ratings | .02 |
|  |  | 128 |  |  |  | EE | Supervisor performance ratings | Observer ratings | .04 |
|  |  |  |  |  |  | DPA | Supervisor performance ratings | Observer ratings | .19 |
|  |  |  |  |  |  | RPA | Supervisor performance ratings | Observer ratings | .01 |
| Block et al. (2013)([36](#_ENREF_36)) | I | 55 | Residents | O | USA | TB: CS | Perceived quality of care | Provider | -.55 |
|  |  |  |  |  | TB: CS | Self-reported errors due to fatigue | Provider | -.34 |
|  |  |  |  |  | TB: CS | Self-reported errors due to work load | Provider | -.39 |
| Burtson et al. (2010)([37](#_ENREF_37)) | I | 126 | Nurses | I/O | USA | TB: CS | Perceived quality: assurance | Provider | -.19 |
|  |  |  |  |  | TB: CS | Perceived quality: knowledge | Provider | -.19 |
| Bužgová & Ivanová (2011)([38](#_ENREF_38)) | I | 454 | Clinical care providers | NH | Czech Republic | TB: CS | Safety: Experienced or witnessed physical abuse of elderly clients | Provider | -.12 |
|  |  |  |  | TB: CS | Safety: Experienced or witnessed psychological abuse of elderly clients | Provider | -.24 |
| Capuzzo et al. (2007)([39](#_ENREF_39)) | H | 6 | Physicians and nurses | IN | Italy | DEP | Patient satisfaction | Patient | .20 |
|  |  |  |  | EE | Patient satisfaction | Patient | -.60 |
|  |  |  |  |  | RPA | Patient satisfaction | Patient | .46 |
| Cheng et al. (2013)([40](#_ENREF_40)) | I | 201 | Nurses | O | Australia | EE | Perceived quality (social dimension of care) | Provider | -.11 |
|  |  |  |  |  | EE | Perceived quality (technical dimension of care) | Provider | -.09 |
| Chui et al. (2014)([41](#_ENREF_41)) | I | 165 | Pharmacists | O | USA | EE | Self-perceived performance: Conducts patient profile review | Provider | -.13 |
|  |  |  |  |  | EE | Self-perceived performance: Counsels patients on new medication | Provider | -.16 |
| Cropanzano et al. (2003)([42](#_ENREF_42)) | I | 150 | Hospital employees | I/O | USA | EE | Supervisor ratings of job performance | Observer ratings | -.26 |
| de Oliveira et al. (2013)([43](#_ENREF_43)) | I | 1,508 | Residents | I/O | USA | DEP | Perceived quality of care | Provider | -.43 |
|  |  |  |  |  | DEP | Self-reported errors scale | Provider | -.45 |
|  |  |  |  |  | EE | Perceived quality of care | Provider | -.30 |
|  |  |  |  |  | EE | Self-reported errors scale | Provider | -.39 |
|  |  |  |  |  | RPA | Perceived quality of care | Provider | -.47 |
|  |  |  |  |  | RPA | Self-reported errors scale | Provider | -.43 |
| Deckard et al. (1994)([44](#_ENREF_44)) | I | 235 | Physicians | I/O | USA | DEP | Perceived quality of care | Provider | -.28 |
|  |  |  |  |  | EE | Perceived quality of care | Provider | -.24 |
| Deo et al. (2012)([45](#_ENREF_45)) | SU | 13 | Clinical care providers | O | Zambia | TB: Item | Test ordered - FUP CD4 count | Medical records | .33 |
|  |  |  |  | TB: Item | Test ordered - IHP hemoglobin | Medical records | -.01 |
|  |  |  |  |  | TB: Item | Test ordered - IHP liver function | Medical records | -.03 |
|  |  |  |  |  | TB: Item | Test ordered - IHP WHO staging | Medical records | .41 |
|  |  |  |  |  | TB: Item | Test ordered - IHP CD4 count | Medical records | .21 |
| Fahrenkopf et al. (2008)([46](#_ENREF_46)) | I | 123 | Residents | I/O | USA | TB: High | Observed medication errors | Observer ratings | .00 |
|  |  |  |  |  | TB: High | Self-report error due to sleep deprivation | Provider | -.19 |
|  |  |  |  |  | TB: High | Self-report error not due to sleep deprivation | Provider | -.11 |
| Garman et al. (2002)([47](#_ENREF_47)) | SU | 31 | Behavioral health staff | I/O | USA | DEP | Satisfaction with environment | Patient | -.13 |
|  |  |  |  | DEP | Satisfaction with preparation for autonomy | Patient | -.09 |
|  |  |  |  |  | DEP | Satisfaction with therapist | Patient | -.03 |
|  |  |  |  |  | DEP | Satisfaction with treatment | Patient | -.04 |
|  |  |  |  |  | EE | Satisfaction with environment | Patient | -.42 |
|  |  |  |  |  | EE | Satisfaction with preparation for autonomy | Patient | -.37 |
|  |  |  |  |  | EE | Satisfaction with therapist | Patient | -.30 |
|  |  |  |  |  | EE | Satisfaction with treatment | Patient | -.43 |
|  |  |  |  |  | RPA | Satisfaction with environment | Patient | -.17 |
|  |  |  |  |  | RPA | Satisfaction with preparation for autonomy | Patient | -.26 |
|  |  |  |  |  | RPA | Satisfaction with therapist | Patient | -.36 |
|  |  |  |  |  | RPA | Satisfaction with treatment | Patient | -.24 |
| Gasparino et al. (2011)([48](#_ENREF_48)) | I | 278 | Nurses | I/O | Brazil | DEP | Perceived quality of care | Provider | -.42 |
|  |  |  |  |  | EE | Perceived quality of care | Provider | -.56 |
|  |  |  |  |  | RPA | Perceived quality of care | Provider | -.41 |
| Giordani (2002)([49](#_ENREF_49)) | I | 149 | Physicians | I/O | USA | TB: CS | Patient satisfaction | Patient | -.07 |
| Gopal et al. (2005)([50](#_ENREF_50), [51](#_ENREF_51)) | I | 227 | Residents | I/O | USA | TB: High | Perceived suboptimal care: Not giving best care after signing out | Provider | -.35 |
|  |  |  |  |  | TB: High | Perceived suboptimal care: Deferring more family meetings and discussions to next day | Provider | -.31 |
|  |  |  |  |  | TB: High | Perceived suboptimal care: Discharging to make services manageable | Provider | -.23 |
|  |  |  |  |  | TB: High | Perceived suboptimal care: Feeling guilty about treatment from a humanitarian standpoint | Provider | -.15 |
|  |  |  |  |  | TB: High | Perceived suboptimal care: Little emotional reaction to patient's death | Provider | -.18 |
|  |  |  |  |  | TB: High | Perceived suboptimal care: Not fully discussing treatment options or answering questions | Provider | -.20 |
|  |  |  |  |  | TB: High | Perceived suboptimal care: Not performing tests due to desire to discharge a patient | Provider | -.12 |
|  |  |  |  |  | TB: High | Perceived suboptimal care: Ordering restraints or medications without evaluating the patient | Provider | -.04 |
|  |  |  |  |  | TB: High | Perceived suboptimal care: Paying little attention to impact of illness | Provider | -.14 |
|  |  |  |  |  | TB: High | Perceived suboptimal care: Self-report error not due to lack of knowledge or experience | Provider | -.12 |
|  |  |  |  |  | TB: High | Perceived suboptimal care: When doing cross cover, deferring more decisions to the next day | Provider | -.42 |
| Gravlin (1994)([52](#_ENREF_52)) | D | 100 | Nurses | IN | USA | DEP | Patient satisfaction | Patient | -.22 |
|  |  |  |  |  | EE | Patient satisfaction | Patient | -.16 |
|  |  |  |  |  | RPA | Patient satisfaction | Patient | -.11 |
| Gunnarsdóttir et al. (2009)([53](#_ENREF_53), [54](#_ENREF_54)) | I | 696 | Nurses | I/O | Iceland | DEP | Nurse perceived quality of care | Provider | -.17 |
|  |  |  |  |  | EE | Perceived quality of care | Provider | -.18 |
|  | 697 |  |  |  | RPA | Perceived quality of care | Provider | -.20 |
| Halbesleben & Rathert (2008)([55](#_ENREF_55)) | D | 178 | Physicians | IN | USA | DEP | Patient satisfaction | Patient | -.29 |
|  |  |  |  |  | EE | Patient satisfaction | Patient | -.13 |
|  |  |  |  |  | RPA | Patient satisfaction | Patient | -.24 |
| Halbesleben, Wakefield, et al. (2008)([56](#_ENREF_56)) | I | 135 | Nurses | I/O | USA | DEP | Near miss reporting frequency | Provider | .41 |
|  |  |  |  |  | DEP | Number of errors reported | Provider | -.03 |
|  |  |  |  |  | DEP | Safety grade | Provider | -.36 |
|  |  |  |  |  | DEP | Safety perceptions | Provider | -.18 |
|  |  |  |  |  | EE | Near miss reporting frequency | Provider | -.35 |
|  |  |  |  |  | EE | Number of errors reported | Provider | -.01 |
|  |  |  |  |  | EE | Safety grade | Provider | -.41 |
|  |  |  |  |  | EE | Safety perceptions | Provider | -.55 |
| Hayashino et al. (2012)([57](#_ENREF_57)) | I | 836 | Physicians | I/O | Japan | DEP | Self-reported medical errors | Provider | -.11 |
|  |  |  |  |  | EE | Self-reported medical errors | Provider | -.08 |
|  |  |  |  |  | RPA | Self-reported medical errors | Provider | -.02 |
| Holden, Patel, et al. (2010)([58](#_ENREF_58)) | I | 79 | Pharmacists/  techs | IN | USA | EE | Self-reported likelihood of adverse event | Provider | -.06 |
|  |  |  |  |  | Self-reported likelihood of error |  | -.13 |
| Holden, Scanlon, et al. (2011)([59](#_ENREF_59)) | SU | 176 | Nurses | IN | USA | EE | Likelihood of error | Provider | -.04 |
| Laschinger & Leiter (2006)([60](#_ENREF_60)) | I | 8,597 | Nurses | IN | Canada | DEP | Frequency of adverse events in past year | Provider | -.34 |
|  |  |  |  |  | EE | Frequency of adverse events in past year | Provider | -.30 |
|  |  |  |  |  | RPA | Frequency of adverse events in past year | Provider | -.22 |
| Leiter et al. (1998)([61](#_ENREF_61)) | SU | 16 | Nurses | IN | Canada | EE | Satisfaction with nurses | Patient | -.73 |
| Linzer et al. (2009)([62](#_ENREF_62), [63](#_ENREF_63)) | I | 422 | Physicians | O | USA | TB: Item | Observed errors | Provider | -.01 |
|  |  |  |  |  | TB: Item | Perceived suboptimal care (errors) | Provider | -.06 |
| Martinussen et al. (2012)([64](#_ENREF_64)) | I | 151 | Human service providers | O | Norway | EE | Perceived service quality | Provider | -.11 |
| Nelson et al. (2014)([65](#_ENREF_65)) | SU | 646 | Primary care personnel | O | USA | EE | Team-based care | Provider | -.11 |
|  |  |  |  | EE | Access to care | Patient and medical records | -.10 |
|  |  |  |  |  | EE | Continuity of care | Patient and medical records | .00 |
|  |  |  |  |  |  | EE | Care coordination | Patient and medical records | -.01 |
|  |  | 645 |  |  |  | EE | Comprehensive care | Patient | .04 |
|  |  |  |  |  |  | EE | Self-management support | Patient | -.02 |
|  |  |  |  |  |  | EE | Patient satisfaction | Patient | -.08 |
|  |  | 646 |  |  |  | TB: Item | Team-based care | Provider | -.12 |
|  |  |  |  |  |  | TB: Item | Access to care | Patient and medical records | -.07 |
|  |  |  |  |  |  | TB: Item | Continuity of care | Patient and medical records | .07 |
|  |  |  |  |  |  | TB: Item | Care coordination | Patient and medical records | .04 |
|  |  | 645 |  |  |  | TB: Item | Comprehensive care | Patient | .05 |
|  |  |  |  |  |  | TB: Item | Self-management support | Patient | .03 |
|  |  |  |  |  |  | TB: Item | Patient satisfaction | Patient | -.01 |
| Passalacqua & Sergin (2012)([66](#_ENREF_66)) | I | 93 | Residents | I/O | USA | TB: CS | Perceived quality of care | Provider | -.40 |
|  |  |  |  |  |  |  |  |  |
| Patrician et al. (2010)([67](#_ENREF_67)) | I | 799 | Nurses | IN | USA | DEP | Perceived quality of care on the unit | Provider | -.25 |
|  |  |  |  |  | EE | Perceived quality of care on the unit | Provider | -.30 |
|  |  |  |  |  | RPA | Perceived quality of care on the unit | Provider | -.20 |
| Prins et al. (2009)([68](#_ENREF_68)) | I | 2,115 | Residents | I/O | Netherlands | DEP | Action/inexperience errors | Provider | -.29 |
|  |  |  |  |  | DEP | Errors due to lack of time | Provider | -.42 |
|  |  |  |  |  | EE | Action/inexperience errors | Provider | -.20 |
|  |  |  |  |  | EE | Errors due to lack of time | Provider | -.43 |
|  |  |  |  |  | RPA | Action/inexperience errors | Provider | -.05 |
|  |  |  |  |  | RPA | Errors due to lack of time | Provider | -.08 |
| Quattrochi-Tubin et al. (1982)([69](#_ENREF_69)) | I | 61 | Counselors/ outreach workers | O | USA | TB: CS | Self-reported errors | Provider | -.39 |
|  |  |  |  | TB: CS | Neglected job duties | Provider | -.33 |
| Ratanawongsa et al. (2008)([70](#_ENREF_70)) | I | 40 | Physicians | O | USA | TB: CS | Patient satisfaction | Patient | -.02 |
| Rathert et al. (2012)([71](#_ENREF_71)) | I | 272 | Clinical care providers | I/O | USA | EE | Perceived quality (client-centered) | Provider | -.35 |
|  |  |  |  | EE | Quality improvement activities | Provider | -.36 |
| Ridley et al. (2009)([72](#_ENREF_72)) | I | 129 | Nurses | I/O | Canada | DEP | Perceived quality of care on the unit | Provider | -.29 |
|  |  |  |  |  | EE | Perceived quality of care on the unit | Provider | -.26 |
|  |  |  |  |  | RPA | Perceived quality of care on the unit | Provider | -.25 |
| Rochefort & Clarke (2010)([73](#_ENREF_73)) | I | 339 | Nurses | IN | Canada | EE | Perceived quality of care | Provider | -.38 |
| Salyers (1998)([74](#_ENREF_74)) | SU | 12 | Assertive outreach workers | ACT | USA | DEP | Patient satisfaction | Patient | .02 |
|  |  |  |  | EE | Patient satisfaction | Patient | .59 |
|  |  |  |  | RPA | Patient satisfaction | Patient | .07 |
| Salyers, Fukui, et al. (2014)([75](#_ENREF_75)) | I | 113 | Behavioral health staff | O | USA | DEP | General work conscientiousness | Provider | -.24 |
|  |  |  |  | DEP | Perceived quality (client-centered) | Provider | -.18 |
|  |  |  |  | DEP | Self-reported errors | Provider | -.13 |
|  |  |  |  |  | DEP | Perceived quality of care | Provider | -.25 |
|  |  |  |  |  | EE | General work conscientiousness | Provider | -.22 |
|  |  |  |  |  | EE | Perceived quality (client-centered) | Provider | .02 |
|  |  |  |  |  | EE | Self-reported errors | Provider | -.01 |
|  |  |  |  |  | EE | Perceived quality of care | Provider | -.05 |
|  |  |  |  |  | RPA | General work conscientiousness | Provider | -.09 |
|  |  |  |  |  | RPA | Perceived quality (client-centered) | Provider | -.53 |
|  |  |  |  |  | RPA | Self-reported errors | Provider | -.03 |
|  |  |  |  |  | RPA | Perceived quality of care | Provider | -.50 |
| Schaufeli et al. (1995)([76](#_ENREF_76)) | SU | 19 | Nurses (ICU) | IN | Netherlands | DEP | Perceived unit effectiveness | Provider | -.36 |
|  |  |  |  |  | EE | Perceived unit effectiveness | Provider | -.44 |
|  |  |  |  |  | RPA | Perceived unit effectiveness | Provider | -.41 |
| Schmidt et al. (2014)([77](#_ENREF_77), [78](#_ENREF_78)) | I | 305 | Nurses | NH | Germany | TB: CS | Perceived quality of care | Provider | -.33 |
| Shanafelt, Balch, et al. (2010)([79](#_ENREF_79)) | I | 7,905 | Surgeons | I/O | USA | DEP | Made major medical error in last 3 months | Provider | -.03 |
|  |  |  |  |  | EE | Made major medical error in last 3 months | Provider | -.01 |
|  |  |  |  |  | RPA | Made major medical error in last 3 months | Provider | -.01 |
| Shanafelt, Bradley et al. (2002)([80](#_ENREF_80)) | I | 114 | Residents | I/O | USA | TB: High | Perceived suboptimal care: Not performing tests due to desire to discharge a patient | Provider | -.02 |
|  |  |  |  |  | TB: High | Perceived suboptimal care : Discharging to make services manageable | Provider | -.27 |
|  |  |  |  |  | TB: High | Perceived suboptimal care: Feeling guilty about treatment from a humanitarian standpoint | Provider | -.32 |
|  |  |  |  |  | TB: High | Perceived suboptimal care: Little emotional reaction to patient’s death | Provider | -.46 |
|  |  |  |  |  | TB: High | Perceived suboptimal care: Not fully discussing treatment options or answering questions | Provider | -.25 |
|  |  |  |  |  | TB: High | Perceived suboptimal care: Ordering restraints or medications without evaluating the patient | Provider | -.12 |
|  |  |  |  |  | TB: High | Perceived suboptimal care: Paying little attention to impact of illness | Provider | -.28 |
|  |  |  |  |  | TB: High | Perceived suboptimal care practices | Provider | -.29 |
| Shirom, Nirel, & Vinokur (2006)([81](#_ENREF_81)) | I | 890 | Physicians | O | Israel | EE | Perceived quality of care | Provider | -.48 |
|  |  |  |  |  | TB: CS | Perceived quality of care | Provider | -.44 |
| Spânu et al. (2012)([82](#_ENREF_82), [83](#_ENREF_83)) | I | 2,486 | Clinical care providers | I/O | Multiple European Countries | DEP | Perceived suboptimal care (errors) | Provider | -.50 |
|  |  |  |  | EE | Perceived suboptimal care (errors) | Provider | -.34 |
| Teng et al. (2010)([84](#_ENREF_84)) | I | 457 | Nurses | IN | Taiwan | DEP | Perceived safety | Provider | -.11 |
|  |  |  |  |  | EE | Perceived safety | Provider | -.11 |
|  |  |  |  |  | RPA | Perceived safety | Provider | .06 |
| Tourangeau et al. (2007)([85](#_ENREF_85)) | I | 3,886 | Nurses | I/O | Canada | EE | Perceived quality of care on the unit | Provider | -.58 |
| Vahey et al. (2004)([86](#_ENREF_86)) | SU | 40 | Nurses | IN | USA | DEP | Patient satisfaction | Patient | -.03 |
|  |  |  |  |  | EE | Patient satisfaction | Patient | -.20 |
|  |  |  |  |  | RPA | Patient satisfaction | Patient | -.28 |
| Van Bogaert, Clarke, et al. (2010)([87](#_ENREF_87), [88](#_ENREF_88)) | I | 546 | Nurses | I/O | Belgium | DEP | Perceived quality of care on the unit | Provider | -.03 |
|  |  |  |  |  | EE | Perceived quality of care on the unit | Provider | -.02 |
|  |  |  |  |  | RPA | Perceived quality of care on the unit | Provider | -.02 |
| Van Bogaert, Clarke, et al. (2013)([89](#_ENREF_89), [90](#_ENREF_90)) | I | 32 | Clinical care providers | I/O | Belgium | DEP | Perceived quality of care on the unit | Provider | -.04 |
|  |  |  |  | EE | Perceived quality of care on the unit | Provider | -.02 |
|  |  |  |  |  | RPA | Perceived quality of care on the unit | Provider | -.02 |
| Van Bogaert, Dilles, et al. (2014)([91](#_ENREF_91)) | SU | 25 | Nurses | IN | Belgium | DEP | Adverse event: Patient falls | Provider | -.08 |
|  |  |  |  |  | DEP | Adverse event: Pulmonary Infections | Provider | -.02 |
|  |  |  |  |  | DEP | Adverse event: Urinary track infections | Provider | -.08 |
|  |  |  |  |  |  | DEP | Medication Errors | Provider | -.16 |
|  |  |  |  |  |  | DEP | Quality of care at current unit | Provider | -.14 |
|  |  |  |  |  |  | DEP | Quality of care in last shift | Provider | -.19 |
|  |  |  |  |  |  | DEP | Quality of care in service over past year | Provider | -.14 |
|  |  |  |  |  |  | DEP | Patient and family complaints | Provider | -.13 |
|  |  |  |  |  |  | EE | Adverse event: Patient falls | Provider | -.04 |
|  |  |  |  |  |  | EE | Adverse event: Pulmonary Infections | Provider | -.06 |
|  |  |  |  |  |  | EE | Adverse event: Urinary track infections | Provider | -.06 |
|  |  |  |  |  |  | EE | Medication Errors | Provider | -.11 |
|  |  |  |  |  |  | EE | Quality of care at current unit | Provider | -.18 |
|  |  |  |  |  |  | EE | Quality of care in last shift | Provider | -.22 |
|  |  |  |  |  |  | EE | Quality of care in service over past year | Provider | -.20 |
|  |  |  |  |  |  | EE | Patient and family complaints | Provider | -.10 |
|  |  |  |  |  |  | RPA | Adverse event: Patient falls | Provider | -.11 |
|  |  |  |  |  |  | RPA | Adverse event: Pulmonary Infections | Provider | -.04 |
|  |  |  |  |  |  | RPA | Adverse event: Urinary track infections | Provider | -.07 |
|  |  |  |  |  |  | RPA | Medication Errors | Provider | -.11 |
|  |  |  |  |  |  | RPA | Quality of care at current unit | Provider | -.14 |
|  |  |  |  |  |  | RPA | Quality of care in last shift | Provider | -.15 |
|  |  |  |  |  |  | RPA | Quality of care in service over past year | Provider | -.07 |
|  |  |  |  |  |  | RAP | Patient and family complaints | Provider | -.10 |
| Van Bogaert, Kowalski, et al. (2013)([92](#_ENREF_92)) | I | 1,201 | Nurses | I/O | Belgium | DEP | Perceived quality of care | Provider | -.26 |
|  |  |  |  |  | EE | Perceived quality of care on the unit | Provider | -.29 |
|  |  |  |  |  | RPA | Perceived quality of care | Provider | -.24 |
| Van Bogaert, Meulemans, et al. (2009)([93](#_ENREF_93)) | I | 401 | Nurses | IN | Belgium | DEP | Perceived quality of care | Provider | -.21 |
|  |  |  |  |  | EE | Perceived quality of care | Provider | -.35 |
|  |  |  |  |  | RPA | Perceived quality of care | Provider | -.28 |
| Van Bogaert, Timmermans et al. (2014)([94](#_ENREF_94)) | SU | 96 | Nurses | NH | Belgium | DEP | Adverse event: Patient falls | Provider | -.09 |
|  |  |  |  |  | DEP | Adverse event: Nosocomial infection | Provider | -.13 |
|  |  |  |  |  | DEP | Medication errors | Provider | -.14 |
|  |  |  |  |  |  | DEP | Patient and family complaints | Provider | -.21 |
|  |  |  |  |  |  | EE | Adverse event: Patient falls | Provider | -.07 |
|  |  |  |  |  |  | EE | Adverse event: Nosocomial infection | Provider | -.08 |
|  |  |  |  |  |  | EE | Medication errors | Provider | -.09 |
|  |  |  |  |  |  | EE | Patient and family complaints | Provider | -.09 |
|  |  |  |  |  |  | RPA | Adverse event: Patient falls | Provider | -.05 |
|  |  |  |  |  |  | RPA | Adverse event: Nosocomial infection | Provider | -.08 |
|  |  |  |  |  |  | RPA | Medication errors | Provider | -.04 |
|  |  |  |  |  |  | RPA | Patient and family complaints | Provider | -.13 |
| Van Roy (2008)([95](#_ENREF_95)) | I | 81 | Clinical care providers | IN | USA | EE | Perceived safety | Provider | -.26 |
|  |  |  |  | EE | Safety of care provided | Provider | -.43 |
| Vogus et al. (2014)([96](#_ENREF_96)) | I | 1053 | Nurses | IN | USA | EE | Adverse event | Medical records | -.07 |
| Welp et al. (2015)([97](#_ENREF_97)) | I | 1391 | Physicians and nurses | IN | Switzerland | DEP | Perceived safety | Provider | -.16 |
|  |  |  |  | EE | Perceived safety | Provider | -.25 |
|  |  |  |  |  |  | RPA | Perceived safety | Provider | -.18 |
| Weng et al. (2011)([98](#_ENREF_98)) | I | 110 | Physicians | O | Taiwan | DEP | Patient Satisfaction: satisfied with care | Patient | -.26 |
|  |  |  |  |  | DEP | Patient Satisfaction: recommend doctor | Patient | -.28 |
|  |  |  |  |  | EE | Patient Satisfaction: satisfied with care | Patient | -.13 |
|  |  |  |  |  | EE | Patient Satisfaction: recommend doctor | Patient | -.20 |
|  |  |  |  |  | RPA | Patient Satisfaction: satisfied with care | Patient | -.14 |
|  |  |  |  |  | RPA | Patient Satisfaction: recommend doctor | Patient | -.21 |
| West, Huschka, et al. (2006)([99](#_ENREF_99)) | I | 184 | Residents | I/O | USA | DEP | Major medical error in last 3 months | Provider | -.03 |
|  |  |  |  |  | EE | Major medical error in last 3 months | Provider | -.02 |
|  |  |  |  |  | RPA | Major medical error in last 3 months | Provider | -.02 |
| West, Tan, et al. (2009)([100](#_ENREF_100)) | I | 321 | Residents | I/O | USA | DEP | Major medical error in last 3 months | Provider | -.02 |
|  |  |  |  |  | EE | Major medical error in last 3 months | Provider | -.02 |
|  |  |  |  |  | RPA | Major medical error in last 3 months | Provider | -.02 |
| Williams et al. (2007)([101](#_ENREF_101)) | I | 426 | Physicians | I/O | USA | TB: Item | Likelihood of future error | Provider | -.13 |
|  |  |  |  |  | TB: Item | Perceived suboptimal quality of care (errors) | Provider | -.18 |
| Yassi et al. (2004)([102](#_ENREF_102)) | H | 8 | Nurses | IN | Canada | EE | Perceived quality of care | Provider | -.87 |
| *Note.* ACT =Assertive Community Treatment teams; D = Dyad;DEP = Depersonalization; EE = Emotional exhaustion; EE: high = High emotional exhaustion; FUP = Follow-up visit; H = Hospital; I = Individual; IHP = Initial health and physical visit; IN = Inpatient; I/O = Inpatient/Outpatient; NH = Nursing home; O = Outpatient; RPA = Reduced personal accomplishment; SU = Service unit; TB: CS = Total burnout composite score; TB: High = High total burnout; TB: Item = Total burnout, single item  aFor each study, Unit, N, Population, Setting, and Location are the same across all study variables unless otherwise noted.  bComplete references are listed in the reference section.  cArticles with multiple references denote overlapping samples.  dEach country was treated as an individual sample. | | | | | | | | | |

| Table 2. Ratings of Study Quality for each Study Included in the Meta-analyses | | | | | | | | | | | | | | | |
| --- | --- | --- | --- | --- | --- | --- | --- | --- | --- | --- | --- | --- | --- | --- | --- |
| Articlea,b | Was the study population clearly specified and defined? | | Was the sample selection random or attempted total population? | | Was the participation rate of eligible individuals at least 50%? | Was the sample size justification, power description, or variance and effect estimates provided? | Was the independent variable (burnout) clearly defined, using a measure that had be validated before? | Did they report reliability information for the independent variable in the current sample? | Was the dependent variable clearly defined, using a measure that had been validated before? | Did they report reliability information for the dependent variable in the current sample? | Were any of the dependent measures assessed by an external source? | Were the independent and dependent variables implemented consistently across all study participants? | Were both variables continuous? | Were data used at the individual level? | Number of quality items present |
| Aiken, Sermeus, et al. (2012) “RN4CAST Study”(1-16) | Yes | Yes | | No | | No | Yes | No | Yes | No | Yes | No | Yes | Yes | 7 |
| Aiken, Sloane, et al. (2011) “International Hospital Study”(12, 13, 17-32) | Yes | No | | No | | No | Yes | Yes | No | No | No | Yes | No | Yes | 5 |
| Anagnostopoulos et al. (2012)(33) | Yes | Yes | | Yes | | No | Yes | Yes | Yes | Yes | Yes | Yes | Yes | Yes | 11 |
| Argentero et al. (2008)(34) | Yes | Yes | | Yes | | No | Yes | Yes | Yes | Yes | Yes | Yes | Yes | No | 10 |
| Beckman et al. (2012)(35) | Yes | Yes | | Yes | | Yes | Yes | No | Yes | Yes | Yes | Yes | Yes | Yes | 11 |
| Block et al. (2013)(36) | Yes | Yes | | Yes | | No | Yes | No | Yes | No | No | Yes | No | Yes | 7 |
| Burtson et al. (2010)(37) | Yes | No | | No | | Yes | Yes | Yes | Yes | Yes | No | Yes | Yes | Yes | 9 |
| Bužgová & Ivanová (2011)(38) | Yes | Yes | | Yes | | No | Yes | No | Yes | No | Yes | Yes | Yes | Yes | 9 |
| Capuzzo et al. (2007)(39) | Yes | Yes | | Yes | | Yes | Yes | Yes | Yes | Yes | Yes | Yes | Yes | No | 11 |
| Cheng et al. (2013)(40) | Yes | No | | No | | No | Yes | Yes | Yes | Yes | No | Yes | Yes | Yes | 8 |
| Chui et al. (2014)(41) | Yes | Yes | | Yes | | No | Yes | Yes | Yes | Yes | No | Yes | Yes | Yes | 10 |
| Cropanzano et al. (2003)(42) | Yes | Yes | | No | | No | Yes | Yes | Yes | Yes | Yes | No | Yes | Yes | 9 |
| de Oliveira et al. (2013)(43) | Yes | No | | Yes | | Yes | Yes | No | Yes | No | No | Yes | Yes | Yes | 8 |
| Deckard et al. (1994)(44) | Yes | Yes | | Yes | | No | Yes | Yes | Yes | Yes | No | No | Yes | Yes | 9 |
| Deo et al. (2012)(45) | No | No | | No | | No | No | No | Yes | No | Yes | Yes | Yes | No | 4 |
| Fahrenkopf et al. (2008)(46) | Yes | No | | Yes | | No | Yes | No | Yes | No | Yes | No | No | Yes | 6 |
| Garman et al. (2002)(47) | Yes | No | | No | | Yes | Yes | Yes | Yes | Yes | Yes | Yes | Yes | No | 9 |
| Gasparino et al. (2011)(48) | Yes | No | | No | | Yes | Yes | No | Yes | Yes | No | Yes | Yes | Yes | 8 |
| Giordani (2002)(49) | Yes | No | | No | | No | No | Yes | Yes | Yes | Yes | Yes | Yes | Yes | 8 |
| Gopal et al. (2005)(50, 51) | Yes | Yes | | Yes | | Yes | Yes | No | Yes | No | No | Yes | No | Yes | 8 |
| Gravlin (1994)(52) | Yes | No | | No | | No | Yes | Yes | Yes | Yes | Yes | Yes | Yes | Yes | 9 |
| Gunnarsdóttir et al. (2009)(53, 54) | Yes | Yes | | Yes | | No | Yes | Yes | Yes | Yes | No | Yes | Yes | Yes | 10 |
| Halbesleben & Rathert (2008)(55) | Yes | No | | No | | NO | Yes | Yes | Yes | Yes | Yes | Yes | Yes | Yes | 9 |
| Halbesleben, Wakefield, et al. (2008)(56) | Yes | Yes | | Yes | | No | Yes | Yes | Yes | Yes | No | Yes | Yes | Yes | 10 |
| Hayashino et al. (2012)(57) | No | No | | Yes | | No | Yes | No | Yes | No | No | Yes | No | Yes | 5 |
| Holden, Patel, et al. (2010)(58) | Yes | No | | Yes | | No | Yes | No | No | No | No | Yes | No | Yes | 5 |
| Holden, Scanlon, et al. (2011)(59) | Yes | No | | Yes | | No | Yes | Yes | No | Yes | No | Yes | No | Yes | 7 |
| Laschinger & Leiter (2006)(60) | Yes | Yes | | Yes | | No | Yes | Yes | Yes | Yes | No | Yes | Yes | Yes | 10 |
| Leiter et al. (1998)(61) | Yes | Yes | | Yes | | No | Yes | Yes | Yes | Yes | Yes | Yes | Yes | No | 10 |
| Linzer et al. (2009)(62, 63) | Yes | Yes | | Yes | | Yes | Yes | No | Yes | Yes | Yes | Yes | No | Yes | 10 |
| Martinussen et al. (2012)(64) | No | No | | No | | No | Yes | Yes | No | Yes | No | Yes | Yes | Yes | 6 |
| Nelson et al. (2014)(65) | Yes | Yes | | No | | No | Yes | No | Yes | Yes | Yes | No | Yes | No | 7 |
| Passalacqua & Sergin (2012)(66) | Yes | No | | No | | No | Yes | Yes | No | Yes | No | Yes | Yes | Yes | 7 |
| Patrician et al. (2010)(67) | Yes | Yes | | Yes | | No | Yes | Yes | Yes | No | No | Yes | No | Yes | 8 |
| Prins et al. (2009)(68) | Yes | Yes | | No | | No | Yes | Yes | No | Yes | No | Yes | Yes | Yes | 8 |
| Quattrochi-Tubin et al. (1982)(69) | Yes | No | | No | | No | Yes | No | No | No | No | Yes | Yes | Yes | 5 |
| Ratanawongsa et al. (2008)(70) | Yes | No | | No | | No | Yes | Yes | Yes | Yes | Yes | Yes | No | Yes | 8 |
| Rathert et al. (2012)(71) | Yes | Yes | | No | | No | Yes | Yes | Yes | Yes | No | Yes | Yes | Yes | 9 |
| Ridley et al. (2009)(72) | Yes | Yes | | No | | No | Yes | No | No | No | No | Yes | Yes | Yes | 6 |
| Rochefort & Clarke (2010)(73) | Yes | Yes | | Yes | | No | Yes | Yes | Yes | Yes | No | Yes | Yes | Yes | 10 |
| Salyers (1998)(74) | Yes | Yes | | Yes | | Yes | Yes | Yes | Yes | No | Yes | Yes | Yes | No | 10 |
| Salyers, Fukui, et al. (2014)(75) | Yes | Yes | | Yes | | No | Yes | Yes | Yes | Yes | No | Yes | Yes | Yes | 10 |
| Schaufeli et al. (1995)(76) | No | No | | Yes | | Yes | Yes | Yes | Yes | No | Yes | Yes | Yes | No | 8 |
| Schmidt et al. (2014)(77, 78) | No | Yes | | No | | No | Yes | Yes | Yes | No | No | No | Yes | Yes | 6 |
| Shanafelt, Balch, et al. (2010)(79) | Yes | No | | No | | Yes | Yes | No | Yes | No | No | Yes | No | Yes | 6 |
| Shanafelt, Bradley et al. (2002)(80) | Yes | Yes | | Yes | | No | Yes | No | No | No | No | Yes | No | Yes | 6 |
| Shirom, Nirel, & Vinokur (2006)(81) | Yes | No | | Yes | | No | Yes | Yes | No | Yes | No | Yes | Yes | Yes | 8 |
| Spânu et al. (2012)(82, 83) | Yes | No | | No | | No | Yes | Yes | Yes | Yes | No | No | Yes | Yes | 7 |
| Teng et al. (2010)(84) | Yes | No | | Yes | | No | Yes | Yes | Yes | Yes | No | Yes | Yes | Yes | 9 |
| Tourangeau et al. (2007)(85) | Yes | Yes | | Yes | | No | Yes | Yes | Yes | Yes | Yes | Yes | Yes | No | 10 |
| Vahey et al. (2004)(86) | Yes | No | | Yes | | No | Yes | Yes | Yes | Yes | Yes | Yes | No | No | 8 |
| Van Bogaert, Clarke, et al. (2010)(87, 88) | Yes | No | | Yes | | No | Yes | No | Yes | No | No | Yes | Yes | Yes | 7 |
| Van Bogaert, Clarke, et al. (2013)(89, 90) | Yes | No | | Yes | | No | Yes | Yes | Yes | Yes | No | Yes | Yes | Yes | 9 |
| Van Bogaert, Dilles, et al. (2014)(91) | Yes | No | | Yes | | No | Yes | Yes | Yes | Yes | No | Yes | No | No | 7 |
| Van Bogaert, Kowalski, et al. (2013)(92) | Yes | No | | No | | Yes | Yes | Yes | Yes | Yes | No | Yes | Yes | Yes | 9 |
| Van Bogaert, Meulemans, et al. (2009)(93) | Yes | No | | Yes | | Yes | Yes | Yes | Yes | Yes | No | Yes | No | Yes | 9 |
| Van Bogaert, Timmermans et al. (2014)(94) | Yes | No | | Yes | | No | Yes | Yes | Yes | Yes | No | Yes | No | Yes | 8 |
| Van Roy (2008)(95) | Yes | No | | No | | No | Yes | Yes | Yes | Yes | No | Yes | Yes | Yes | 8 |
| Vogus et al. (2014)(96) | Yes | No | | Yes | | No | Yes | No | Yes | No | Yes | No | Yes | Yes | 7 |
| Welp et al. (2015)(97) | Yes | No | | No | | No | Yes | Yes | Yes | No | Yes | Yes | Yes | Yes | 8 |
| Weng et al. (2011)(98) | No | No | | Yes | | No | Yes | Yes | Yes | Yes | Yes | Yes | Yes | Yes | 9 |
| West, Huschka, et al. (2006)(99) | Yes | Yes | | Yes | | No | Yes | No | No | No | No | Yes | No | Yes | 6 |
| West, Tan, et al. (2009)(100) | Yes | Yes | | Yes | | Yes | Yes | No | Yes | No | No | Yes | No | Yes | 8 |
| Williams et al. (2007)(101) | Yes | No | | Yes | | -- | Yes | No | Yes | Yes | No | Yes | Yes | Yes | 8 |
| Yassi et al. (2004)(102) | Yes | Yes | | Yes | | No | Yes | Yes | Yes | Yes | Yes | Yes | Yes | No | 10 |

Table 3. Forest plot of burnout and quality of care meta-analysis.





Table 4. Forest plot of burnout and safety meta-analysis.





Figure 1. Funnel plot of burnout and quality of care effect sizes.

Figure 2. Funnel plot of burnout and safety effect sizes.

References

1. Aiken LH, Sermeus W, Van den Heede K, et al. Patient safety, satisfaction, and quality of hospital care: cross sectional surveys of nurses and patients in 12 countries in Europe and the United States. BMJ. 2012;344:e1717.

2. Aiken LH, Sloane DM, Cimiotti JP, et al. Implications of the California nurse staffing mandate for other states. Health Serv Res. 2010;45(4):904-21.

3. Bruyneel L, Van den Heede K, Diya L, Aiken L, Sermeus W. Predictive validity of the International Hospital Outcomes Study questionnaire: an RN4CAST pilot study. J Nurs Scholarsh. 2009;41(2):202-10.

4. Cimiotti JP, Aiken LH, Sloane DM, Wu ES. Nurse staffing, burnout, and health care-associated infection. Am J Infect Control. 2012;40(6):486-90.

5. Kirwan M, Matthews A, Scott PA. The impact of the work environment of nurses on patient safety outcomes: a multi-level modelling approach. Int J Nurs Stud. 2013;50(2):253-63.

6. McHugh MD, Kutney-Lee A, Cimiotti JP, Sloane DM, Aiken LH. Nurses' Widespread Job Dissatisfaction, Burnout, And Frustration With Health Benefits Signal Problems For Patient Care. Health Aff. 2011;30(2):202-10.

7. Neff DF, Cimiotti JP, Heusinger AS, Aiken LH. Nurse reports from the frontlines: analysis of a statewide nurse survey. Nurs Forum. 2011;46(1):4-10.

8. Shang J, Friese CR, Wu E, Aiken LH. Nursing practice environment and outcomes for oncology nursing. Cancer Nurs. 2013;36(3):206-12.

9. Stimpfel AW, Aiken LH. Hospital staff nurses' shift length associated with safety and quality of care. J Nurs Care Qual. 2013;28(2):122-9.

10. Stimpfel AW, Sloane DM, Aiken LH. The longer the shifts for hospital nurses, the higher the levels of burnout and patient dissatisfaction. Health Aff. 2012;31(11):2501-9.

11. Stimpfel AW, Lake ET, Barton S, Gorman KC, Aiken LH. How differing shift lengths relate to quality outcomes in pediatrics. J Nurs Adm. 2013;43(2):95-100.

12. Aiken LH, Sloane DM, Clarke S, et al. Importance of work environments on hospital outcomes in nine countries. Int J Qual Health Care. 2011;23(4):357-64.

13. Zander B, Dobler L, Busse R. The introduction of DRG funding and hospital nurses' changing perceptions of their practice environment, quality of care and satisfaction: Comparison of cross-sectional surveys over a 10-year period. Int J Nurs Stud. 2013;50(2):219-29.

14. Fuentelsaz-Gallego C, Moreno-Casbas T, López-Zorraquino D, Gómez-García T, González-María E, RN4CAST-España consorcio. Perception of work environment of nurses in hospitals of the Spanish national health system. RN4CAST-Spain project [in Spanish]. Enfermeria Clinica. 2012;22(5):261-8.

15. Abad-Corpa E, Molina-Durán F, Vivo-Molina MC, et al. RN4CAST Study in Murcia: Hospital organizational characteristics and nursing staff profiles [in spanish]. Rev Calid Asist. 2013;28(6):345-54.

16. Escobar-Aguilar G, Gomez-Garcia T, Ignacio-Garcia E, et al. Work environment and patient safety: data comparison between Seneca and RN4CAST projects [in spanish]. Enferm Clin. 2013;23(3):103-13.

17. Aiken LH, Clarke SP, Sloane DM, et al. Nurses’ reports on hospital care In five countries. Health Aff. 2001;20(3):43-53.

18. Aiken LH, Clarke SP, Sloane DM. Hospital staffing, organization, and quality of care: cross-national findings. Int J Qual Health Care. 2002;14(1):5-13.

19. Aiken LH, Clarke SP, Sloane DM, Sochalski J, Silber JH. Hospital nurse staffing and patient mortality, nurse burnout, and job dissatisfaction. JAMA. 2002;288(16):1987-93.

20. Aiken LH, Clarke SP, Sloane DM, Lake ET, Cheney T. Effects of hospital care environment on patient mortality and nurse outcomes. J Nurs Adm. 2008;38(5):223-9.

21. Aiken LH, Sloane DM, Sochalski J. Hospital organisation and outcomes. Qual Health Care. 1998;7(4):222-6.

22. Finlayson M, Aiken L, Nakarada-Kordic I. New Zealand nurses' reports on hospital care: an international comparison. Nurs Prax N Z. 2007;23(1):17-28.

23. Friese CR. Nurse practice environments and outcomes: implications for oncology nursing. Oncol Nurs Forum. 2005;32(4):765-72.

24. Hanrahan NP, Aiken LH. Psychiatric nurse reports on the quality of psychiatric care in general hospitals. Qual Manag Health Care. 2008;17(3):210-7.

25. Kanai-Pak M, Aiken LH, Sloane DM, Poghosyan L. Poor work environments and nurse inexperience are associated with burnout, job dissatisfaction and quality deficits in Japanese hospitals. J Clin Nurs. 2008;17(24):3324-9.

26. Laschinger HKS, Shamian J, Thomson D. Impact of magnet hospital characteristics on nurses' perceptions of trust, burnout, quality of care, and work satisfaction. Nurs Econ. 2001;19(5):209-19.

27. Nantsupawat A, Srisuphan W, Kunaviktikul W, Wichaikhum OA, Aungsuroch Y, Aiken LH. Impact of nurse work environment and staffing on hospital nurse and quality of care in Thailand. J Nurs Scholarsh. 2011;43(4):426-32.

28. Poghosyan L. Cross-national exploration of nurse burnout: predictors and consequences in eight countries [dissertation]. Philadelphia (PA): University of Pennsylvania; 2008.

29. Poghosyan L, Clarke SP, Finlayson M, Aiken LH. Nurse burnout and quality of care: Cross-national investigation in six countries. Res Nurs Health. 2010;33(4):288-98.

30. Rafferty AM, Ball J, Aiken LH. Are teamwork and professional autonomy compatible, and do they result in improved hospital care? Qual Health Care. 2001;10 Suppl 2:ii32-7.

31. Rafferty AM, Clarke SP, Coles J, et al. Outcomes of variation in hospital nurse staffing in English hospitals: cross-sectional analysis of survey data and discharge records. Int J Nurs Stud. 2007;44(2):175-82.

32. Sochalski J. Quality of care, nurse staffing, and patient outcomes. Policy Polit Nurs Pract. 2001;2(1):9-18.

33. Anagnostopoulos F, Liolios E, Persefonis G, Slater J, Kafetsios K, Niakas D. Physician burnout and patient satisfaction with consultation in primary health care settings: Evidence of relationships from a one-with-many design. J Clin Psychol Med Settings. 2012;19(4):401-10.

34. Argentero P, Dell'Olivo B, Ferretti MS. Staff burnout and patient satisfaction with the quality of dialysis care. Am J Kidney Dis. 2008;51(1):80-92.

35. Beckman TJ, Reed DA, Shanafelt TD, West CP. Resident physician well-being and assessments of their knowledge and clinical performance. J Gen Intern Med. 2012;27(3):325-30.

36. Block L, Wu AW, Feldman L, Yeh HC, Desai SV. Residency schedule, burnout and patient care among first-year residents. Postgrad Med J. 2013;89(1055):495-500.

37. Burtson PL, Stichler JF. Nursing work environment and nurse caring: Relationship among motivational factors. J Adv Nurs. 2010;66(8):1819-31.

38. Buzgova R, Ivanova K. Violation of ethical principles in institutional care for older people. Nurs Ethics. 2011;18(1):64-78.

39. Capuzzo M, Gilli G, Paparella L, et al. Factors predictive of patient satisfaction with anesthesia. Anesthesia and analgesia. 2007;105(2):435-42.

40. Cheng C, Bartram T, Karimi L, Leggat SG. The role of team climate in the management of emotional labour: implications for nurse retention. J Adv Nurs. 2013;69(12):2812-25.

41. Chui MA, Look KA, Mott DA. The association of subjective workload dimensions on quality of care and pharmacist quality of work life. Res Social Adm Pharm. 2014;10(2):328-40.

42. Cropanzano R, Rupp DE, Byrne ZS. The relationship of emotional exhaustion to work attitudes, job performance, and organizational citizenship behaviors. J Appl Psychol. 2003;88(1):160-9.

43. de Oliveira GS, Chang R, Fitzgerald PC, et al. The prevalence of burnout and depression and their association with adherence to safety and practice standards: a survey of United States anesthesiology trainees. Anesthesia and analgesia. 2013;117(1):182-93.

44. Deckard G, Meterko M, Field D. Physician burnout: an examination of personal, professional, and organizational relationships. Med Care. 1994;32(7):745-54.

45. Deo S, Topp SM, Westfall AO, et al. Impact of organizational factors on adherence to laboratory testing protocols in adult HIV care in Lusaka, Zambia. BMC Health Serv Res. 2012;12(1):106.

46. Fahrenkopf AM, Sectish TC, Barger LK, et al. Rates of medication errors among depressed and burnt out residents: prospective cohort study. BMJ. 2008;336(7642):488-91.

47. Garman AN, Corrigan PW, Morris S. Staff burnout and patient satisfaction: Evidence of relationships at the care unit level. J Occup Health Psychol. 2002;7(3):235-41.

48. Gasparino RC, Guirardello ED, Aiken LH. Validation of the Brazilian version of the Nursing Work Index-Revised (B-NWI-R). J Clin Nurs. 2011;20(23-24):3494-501.

49. Giordani PJ. Individual and organizational level moderators of physician communication skills training [dissertation]. Riverside (CA): University of California, Riverside; 2002.

50. Gopal RK, Carreira F, Baker WA, et al. Does internal medicine resident burnout affect self-reported quality of care? J Gen Intern Med. 2005;20:153-4.

51. Gopal R, Glasheen JJ, Miyoshi TJ, Prochazka AV. Burnout and internal medicine resident work-hour restrictions. J Gen Intern Med. 2005;165(22):2595-600.

52. Gravlin GL. The relationships among nurse work satisfaction, burnout, and patient satisfaction with nursing care [dissertation]. New York City (NY): Columbia University Teachers College; 1994.

53. Gunnarsdóttir S, Clarke SP, Rafferty AM, Nutbeam D. Front-line management, staffing and nurse-doctor relationships as predictors of nurse and patient outcomes. A survey of Icelandic hospital nurses. Int J Nurs Stud. 2009;46(7):920-7.

54. Gunnarsdóttir S. Quality of working life and quality of care in Icelandic hospital nursing [dissertation]. London (UK): University of London; 2006.

55. Halbesleben JR, Rathert C. Linking physician burnout and patient outcomes: exploring the dyadic relationship between physicians and patients. Health Care Manage Rev. 2008;33(1):29-39.

56. Halbesleben JR, Wakefield BJ, Wakefield DS, Cooper LB. Nurse burnout and patient safety outcomes: nurse safety perception versus reporting behavior. West J Nurs Res. 2008;30(5):560-77.

57. Hayashino Y, Utsugi-Ozaki M, Feldman MD, Fukuhara S. Hope modified the association between distress and incidence of self-perceived medical errors among practicing physicians: Prospective cohort study. PLoS ONE. 2012;7(4).

58. Holden RJ, Patel NR, Scanlon MC, Shalaby TM, Arnold JM, Karsh BT. Effects of mental demands during dispensing on perceived medication safety and employee well-being: A study of workload in pediatric hospital pharmacies. Res Social Adm Pharm. 2010;6(4):293-306.

59. Holden RJ, Scanlon MC, Patel NR, et al. A human factors framework and study of the effect of nursing workload on patient safety and employee quality of working life. BMJ Qual Saf. 2011;20(1):15-24.

60. Laschinger HKS, Leiter MP. The impact of nursing work environments on patient safety outcomes: The mediating role of burnout engagement. J Nurs Adm. 2006;36(5):259-67.

61. Leiter MP, Harvie P, Frizzel C. The correspondence of patient satisfaction and nurse burnout. Soc Sci Med. 1998;47(10):1611-7.

62. Linzer M, Manwell LB, Williams ES, et al. Working conditions in primary care: physician reactions and care quality. Ann Intern Med. 2009;151(1):28-36, W6-9.

63. An PG, Manwell LB, Williams ES, et al. Does a higher frequency of difficult patient encounters lead to lower quality care? J Fam Pract. 2013;62(1):24-9.

64. Martinussen M, Adolfsen F, Lauritzen C, Richardsen AM. Improving interprofessional collaboration in a community setting: Relationships with burnout, engagement and service quality. J Interprof Care. 2012;26(3):219-25.

65. Nelson KM, Helfrich C, Sun H, et al. Implementation of the patient-centered medical home in the Veterans Health Administration: associations with patient satisfaction, quality of care, staff burnout, and hospital and emergency department use. JAMA Internal Medicine. 2014;174(8):1350-8.

66. Passalacqua SA, Segrin C. The effect of resident physician stress, burnout, and empathy on patient-centered communication during the long-call shift. Health Communication. 2012;27(5):449-56.

67. Patrician PA, Shang J, Lake ET. Organizational determinants of work outcomes and quality care ratings among Army Medical Department registered nurses. Res Nurs Health. 2010;33(2):99-110.

68. Prins JT, van der Heijden FM, Hoekstra-Weebers JE, et al. Burnout, engagement and resident physicians' self-reported errors. Psychol Health Med. 2009;14(6):654-66.

69. Quattrochi-Tubin SJ, Jones JW, Breedlove V. The burnout syndrome in geriatric counselors and service workers. Act Adapt Aging 1982;3(1):65-76.

70. Ratanawongsa N, Roter D, Beach MC, et al. Physician burnout and patient-physician communication during

primary care encounters. J Gen Intern Med. 2008;23(10):1581-8.

71. Rathert C, Williams ES, Lawrence ER, Halbesleben JR. Emotional exhaustion and workarounds in acute care: cross sectional tests of a theoretical framework. Int J Nurs Stud. 2012;49(8):969-77.

72. Ridley J, Wilson B, Harwood L, Laschinger HK. Work environment, health outcomes and Magnet hospital traits in the Canadian nephrology nursing scene. CANNT J. 2009;19(1):28-35.

73. Rochefort CM, Clarke SP. Nurses’ work environments, care rationing, job outcomes, and quality of care on neonatal units. J Adv Nurs. 2010;66(10):2213-24.

74. Salyers MP. Predictors and consequences of staff burnout: A longitudinal study of assertive community treatment case managers [dissertation]. Indianapolis (IN): Indiana University-Purdue University Indianapolis; 1998.

75. Salyers MP, Fukui S, Rollins AL, et al. Burnout and Self-Reported Quality of Care in Community Mental Health. Adm Policy Ment Health. 2015;42(1):61-9.

76. Schaufeli WB, Keijsers GJ, Reis MD. Burnout, technology use, and ICU-performance. In: Murphy SLSLR, editor. Organizational risk factors for job stress. Washington, DC, US: American Psychological Association;1995. p. 259-71.

77. Schmidt SG, Dichter MN, Bartholomeyczik S, Hasselhorn HM. The satisfaction with the quality of dementia care and the health, burnout and work ability of nurses: A longitudinal analysis of 50 German nursing homes. Geriatr Nurs. 2014;35(1):42-6.

78. Schmidt SG, Dichter M, Palm R, Müller BH, Hasselhorn HM. Attractiveness of Nursing Homes for nurses in relation to work environment and health and attitudinal outcomes: Results from the German 3Q-Study. 21st International Nursing Research Congress; 2010 Jul 12-16; Orlando, Florida.

79. Shanafelt TD, Balch CM, Bechamps G, et al. Burnout and medical errors among American surgeons. Ann Surg. 2010;251(6):995-1000.

80. Shanafelt TD, Bradley KA, Wipt JE, Back AL. Burnout and Self-Reported Patient Care in an Internal Medicine Residency Program. Ann Intern Med. 2002;136(5):358-67.

81. Shirom A, Nirel N, Vinokur AD. Overload, autonomy, and burnout as predictors of physicians' quality of care. J Occup Health Psychol. 2006;11(4):328-42.

82. Spânu F, editor Organizational culture, burnout and quality of care: The ORCAB project. 27th conference of the European Health Psychology Society; 2013 Jul 16th-20th; Bordeaux, France.

83. Spânu F, Băban A, Bria M, Lucăcel R. Job Demands and Quality of Care: Burnout as a Mediator. Seventh Framework Programme; 2012.

84. Teng C, Shyu YL, Chiou W, Fan H, Lam SM. Interactive effects of nurse-experienced time pressure and burnout on patient safety: A cross-sectional survey. Int J Nurs Stud. 2010;47(11):1442-50.

85. Tourangeau AE, Doran DM, McGillis Hall L, et al. Impact of hospital nursing care on 30-day mortality for acute medical patients. J Adv Nurs. 2007;57(1):32-44.

86. Vahey DC, Aiken LH, Sloane DM, Clarke SP, Vargas D. Nurse burnout and patient satisfaction. Med Care. 2004;42(2 Suppl):II57-II66.

87. Van Bogaert P, Clarke S, Roelant E, Meulemans H, Van de Heyning P. Impacts of unit-level nurse practice environment and burnout on nurse-reported outcomes: A multilevel modelling approach. J Clin Nurs. 2010;19(11-12):1664-74.

88. Van Bogaert P, Clarke S, Vermeyen K, Meulemans H, Van de Heyning P. Practice environments and their associations with nurse-reported outcomes in Belgian hospitals: development and preliminary validation of a Dutch adaptation of the Revised Nursing Work Index. Int J Nurs Stud. 2009;46(1):54-64.

89. Van Bogaert P, Clarke S, Willems R, Mondelaers M. Nurse practice environment, workload, burnout, job outcomes, and quality of care in psychiatric hospitals: A structural equation model approach. J Adv Nurs. 2013;69(7):1515-24.

90. Van Bogaert P, Clarke S, Wouters K, Franck E, Willems R, Mondelaers M. Impacts of unit-level nurse practice environment, workload and burnout on nurse-reported outcomes in psychiatric hospitals: A multilevel modelling approach. Int J Nurs Stud. 2013;50(3):357-65.

91. Van Bogaert P, Dilles T, Wouters K, Van Rompaey B. Practice environment, work characteristics and levels of burnout as predictors of nurse

reported job outcomes, quality of care and patient adverse events: A study across residential aged care services. Open J Nurs. 2014;4(5):343-55.

92. Van Bogaert P, Kowalski C, Weeks SM, Van Heusden D, Clarke SP. The relationship between nurse practice environment, nurse work characteristics, burnout and job outcome and quality of nursing care: A cross-sectional survey. Int J Nurs Stud. 2013;50(12):1667-77.

93. Van Bogaert P, Meulemans H, Clarke S, Vermeyen K, Van de Heyning P. Hospital nurse practice environment, burnout, job outcomes and quality of care: Test of a structural equation model. J Adv Nurs. 2009;65(10):2175-85.

94. Van Bogaert P, Timmermans O, Weeks SM, van Heusden D, Wouters K, Franck E. Nursing unit teams matter: Impact of unit-level nurse practice environment, nurse work characteristics, and burnout on nurse reported job outcomes, and quality of care, and patient adverse events--a cross-sectional survey. Int J Nurs Stud. 2014;51(8):1123-34.

95. Van Roy KS. The perceived workload of ICU physicians and physician extenders and its relationship to burnout, patient safety, and quality of care [dissertation]. Madison (WI): The University of Wisconsin-Madison; 2008.

96. Vogus TJ, Cooil B, Sitterding M, Everett LQ. Safety organizing, emotional exhaustion, and turnover in hospital nursing units. Med Care. 2014;52(10):870-6.

97. Welp A, Meier LL, Manser T. Emotional exhaustion and workload predict clinician-rated and objective patient safety. Front Psychol. 2015;5:1573.

98. Weng HC, Hung CM, Liu YT, et al. Associations between emotional intelligence and doctor burnout, job satisfaction and patient satisfaction. Med Educ. 2011;45(8):835-42.

99. West CP, Huschka MM, Novotny PJ, et al. Association of perceived medical errors with resident distress and empathy: a prospective longitudinal study. JAMA. 2006;296(9):1071-8.

100. West CP, Tan AD, Habermann TM, Sloan JA, Shanafelt TD. Association of resident fatigue and distress with perceived medical errors. JAMA. 2009;302(12):1294-300.

101. Williams ES, Manwell LB, Konrad TR, Linzer M. The relationship of organizational culture, stress, satisfaction, and burnout with physician-reported error and suboptimal patient care: Results from the MEMO study. Health Care Manage Rev. 2007;32(3):203-12.

102. Yassi A, Cohen M, Cvitkovich Y, et al. Factors associated with staff injuries in intermediate care facilities in British Columbia, Canada. Nurs Res. 2004;53(2):87-98.
